# Supplementary material for: RNA-seq Characterization of Sex-Differences in Adipose Tissue of Obesity Affected Patients: Computational Analysis of Differentially Expressed Coding and Non-Coding RNAs
Source: MDPI journal article supplement (doi:10.3390/jpm11050352), 2021-04-28
Supplement: s1 [file s1]

|           |                                |
|-----------|--------------------------------|
| 18S-FW    | AGTACGCAGGGCCGGTACAGTGAAACTGCG |
| 18S-REV   | CGGGTTGGTTTTGATCTGATAAATGCACGC |
| TTY15-FW  | GGACCGGGAGATAGGAGTGT           |
| TTY15-REV | CACGGA CTCCAGGTGATGAG          |
| UTY-FW    | GCACCACTGGTTTTGTAGCTG          |
| UTY-REV   | GCACTGTGTCCAGTTGCTTG           |
| KDM5D-FW  | TGGTGTTTGTAGTGCTCTGTGA         |
| KDM5D-REV | TGGTGTTTGTAGTGCTCTGTGA         |
| XIST-FW   | TAGGTGGAGATGGGGCATGA           |
| XIST-REV  | GCCCAGTGGTAGTGAGCTTT           |
| ROR2-FW   | TAACCAGCACAAACAGGCCA           |
| ROR2-REV  | ATGAACCTCACCGCAGACAG           |
